# Supplementary material for: Microenvironment-responsive multifunctional hydrogels with spatiotemporal sequential release of tailored recombinant human collagen type III for the rapid repair of infected chronic diabetic wounds
Source: Royal Society of Chemistry journal article supplement (doi:10.1039/d1tb02170b), 2021-01-01
Supplement: d1tb02170b1.pdf [file d1tb02170b1.pdf]

## Electronic Supplementary Information

### **Microenvironment-responsive multifunctional hydrogels with spatiotemporal sequential release of tailored recombinant humanized collagen type III for the rapid repair of infected diabetic chronic wounds**

*Cheng Hu<sup>a</sup>, Wenqi Liu<sup>a</sup>, Linyu Long<sup>a</sup>, Zhicun Wang<sup>a</sup>, Yihui Yuan<sup>a</sup>, Wen Zhang<sup>a</sup>, ShuYi He<sup>a</sup>, Jian Wang<sup>c</sup>, Li Yang<sup>a\*</sup>, Lu Lu<sup>b</sup>, Yunbing Wang<sup>a</sup>*

<sup>a</sup> National Engineering Research Center for Biomaterials, Chuanda-Jinbo Joint Research Center, Sichuan University, Chengdu, 610064, People's Republic of China

<sup>b</sup> Key Laboratory of Medical Molecular Virology (MOE/NHC/CAMS), School of Basic Medical Sciences and Shanghai Public Health Clinical Center, Fudan-Jinbo Joint Research Center, Fudan University, Shanghai, 200302, People's Republic of China

<sup>c</sup> Shanxi Jinbo Biomedicine Co., Ltd, Taiyuan, 030000, People's Republic of China

**\*Corresponding Author:**

\*E-mail: yanglisc@scu.edu.cn. Tel.: 86-28-85410280 (L. Y.).

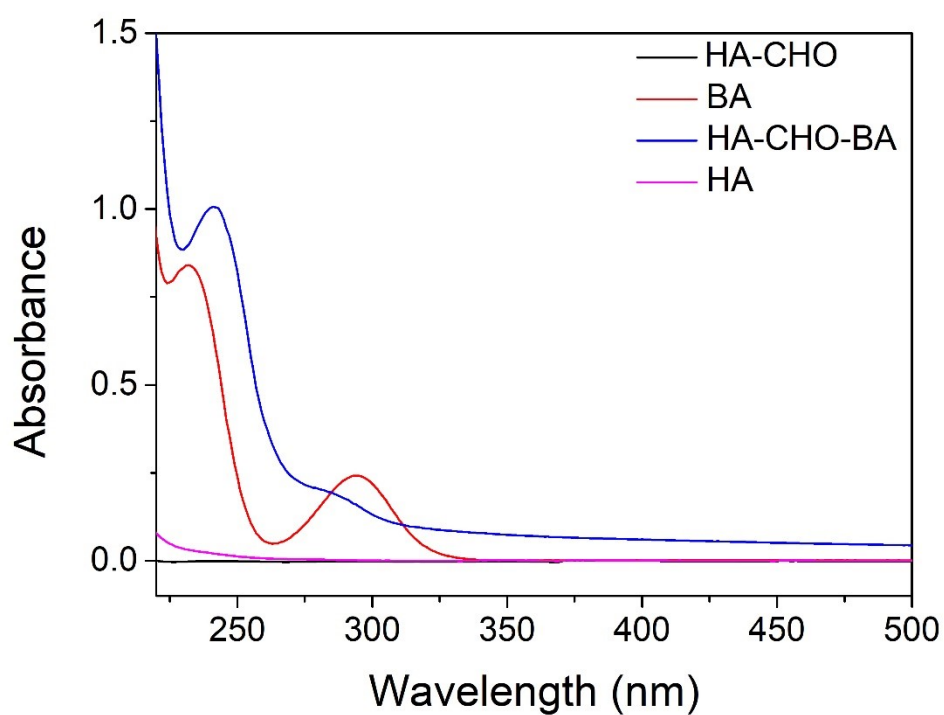

Figure S1. UV-Vis spectra of BA, HA, HA-CHO and HA-CHO-BA.

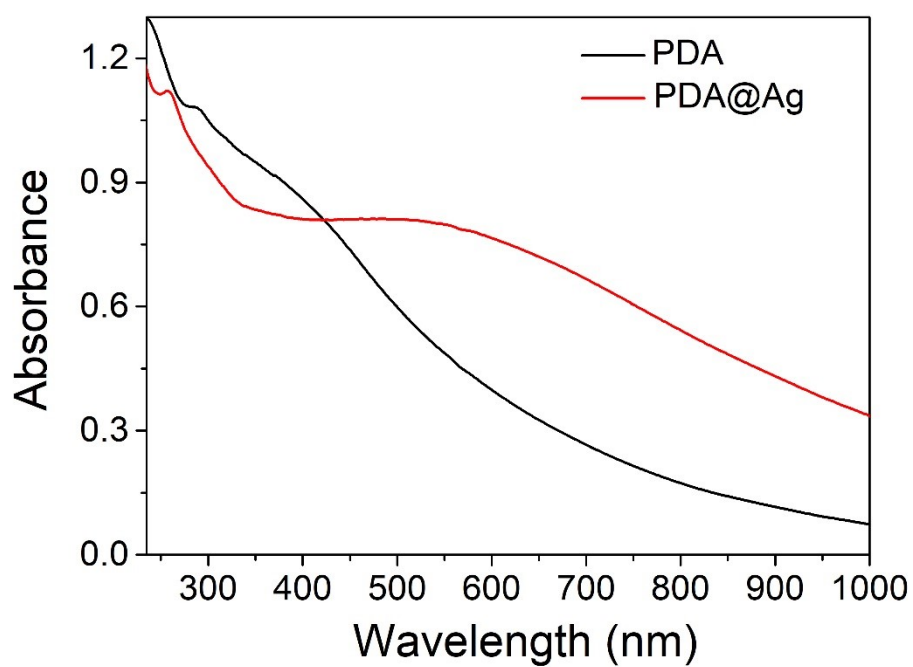

Figure S2. The UV-Vis spectra of PDA NPs and PDA@Ag.

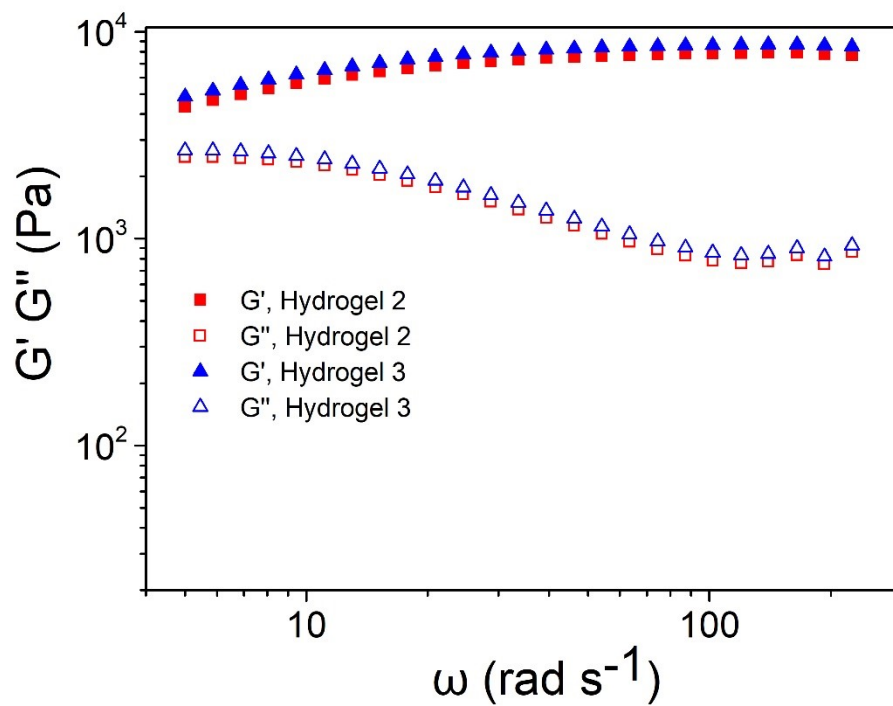

Figure S3. The frequency sweep tests of hydrogel 2 and hydrogel 3.

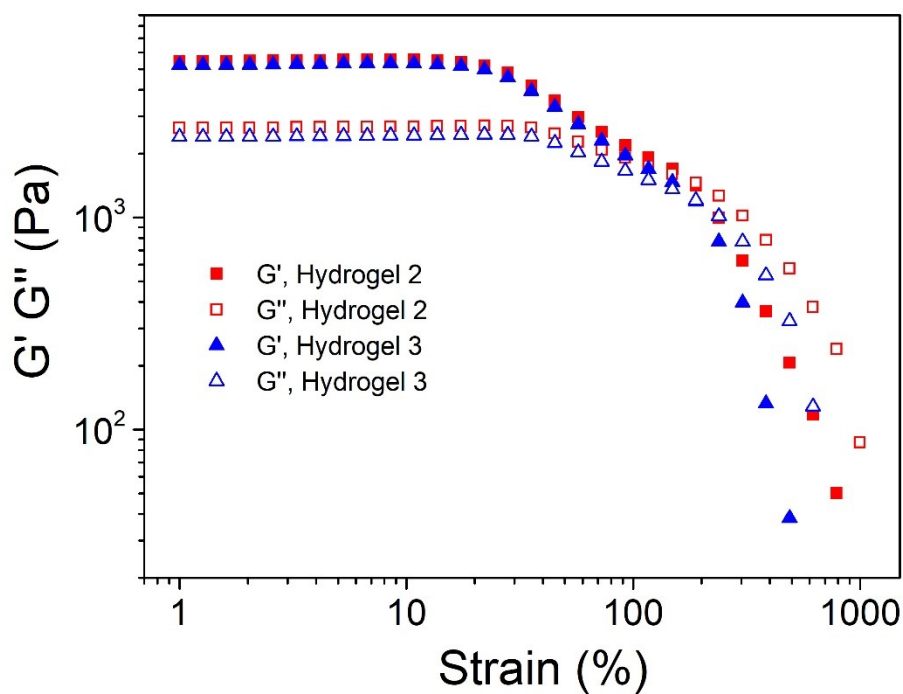

Figure S4. The amplitude sweep tests of hydrogel 2 and hydrogel 3.

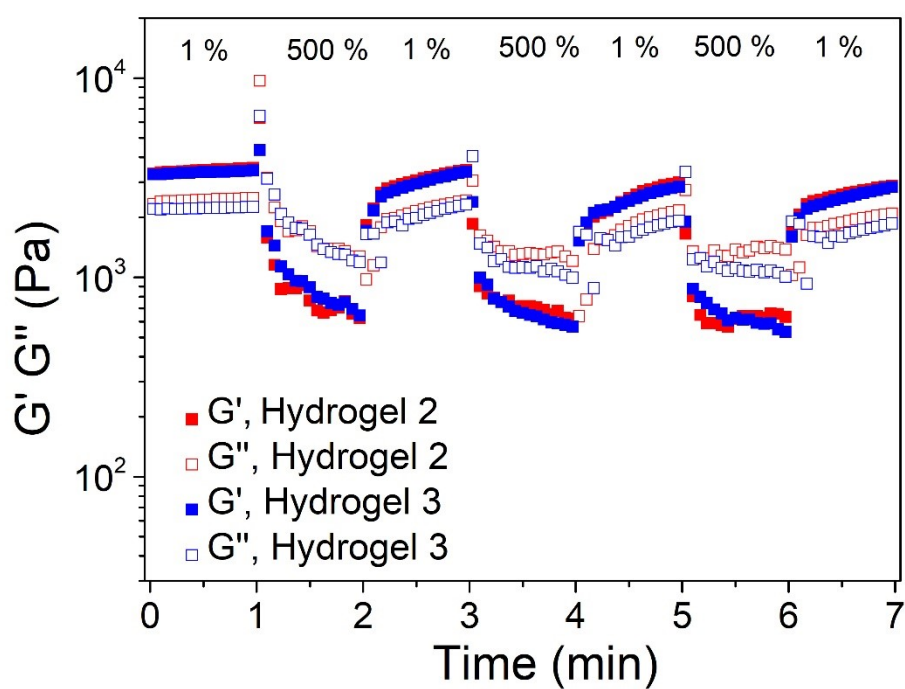

Figure S5. Step-strain sweep tests of hydrogel 2 and hydrogel 3.

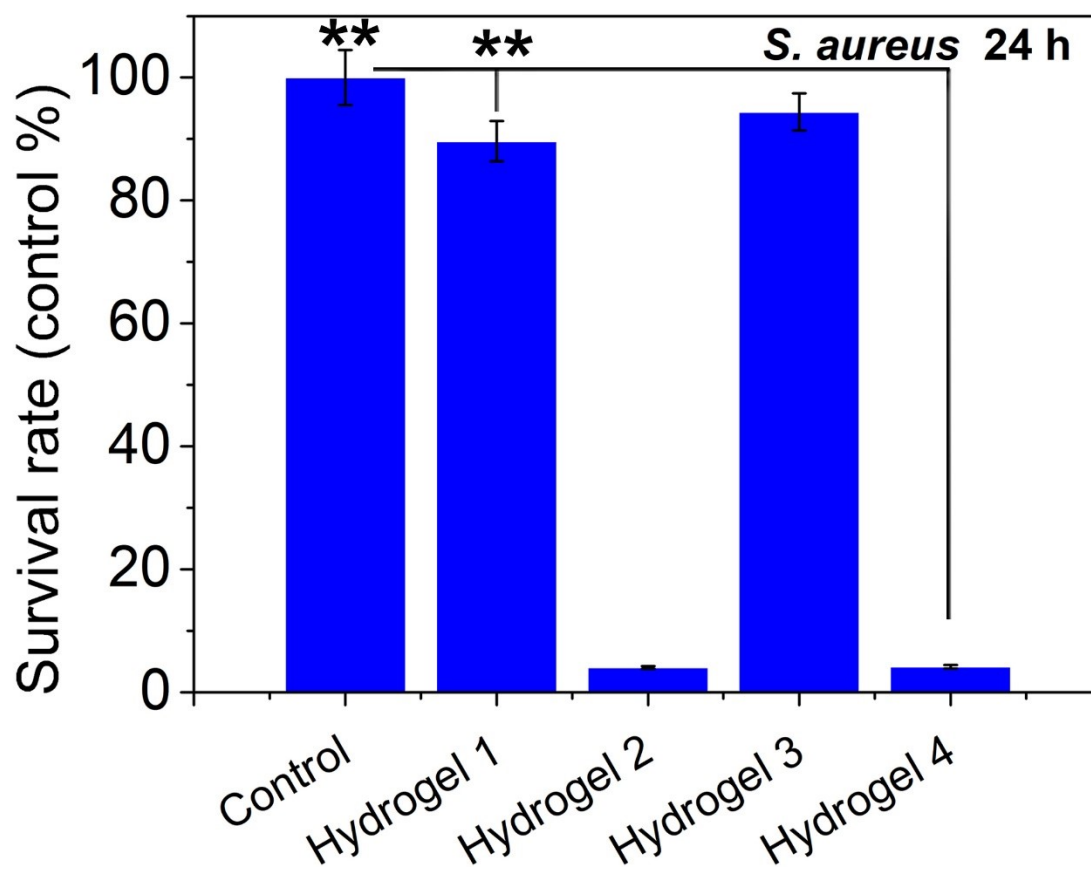

Figure S6. The survival ratios of *S. aureus* at 24 h.

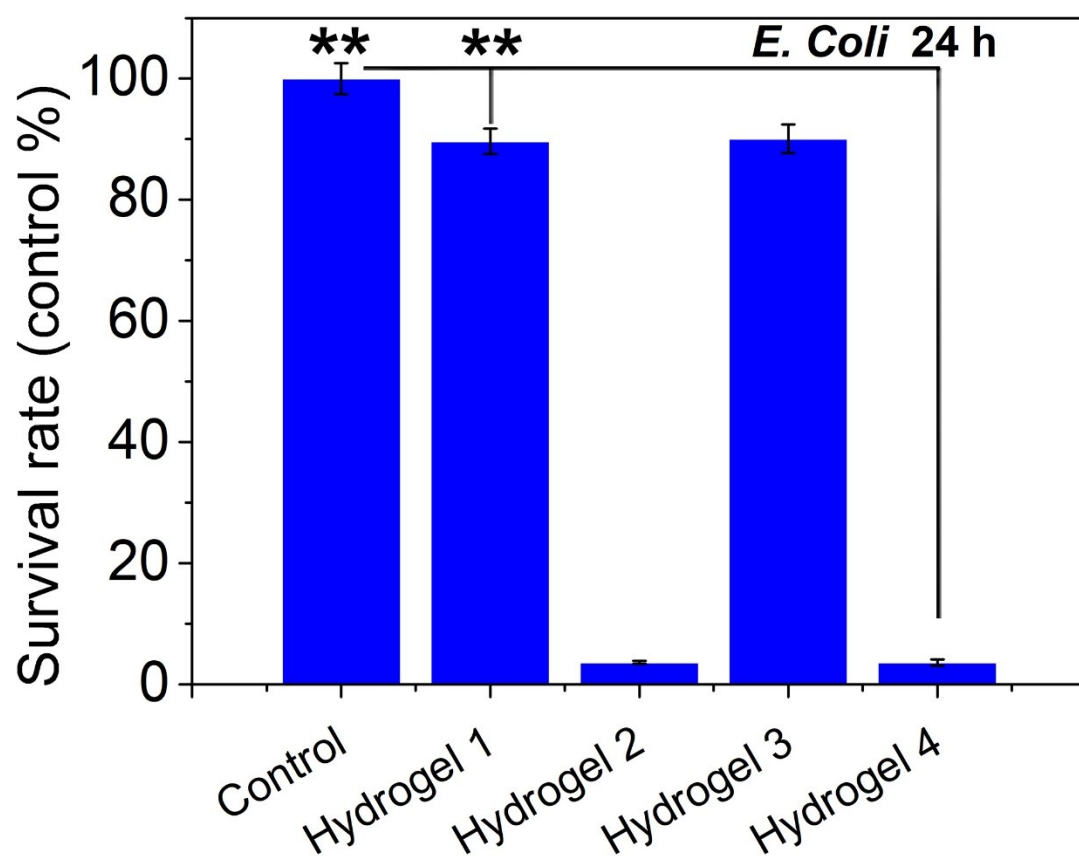

Figure S7. The survival ratios of *E. coli* at 24 h.

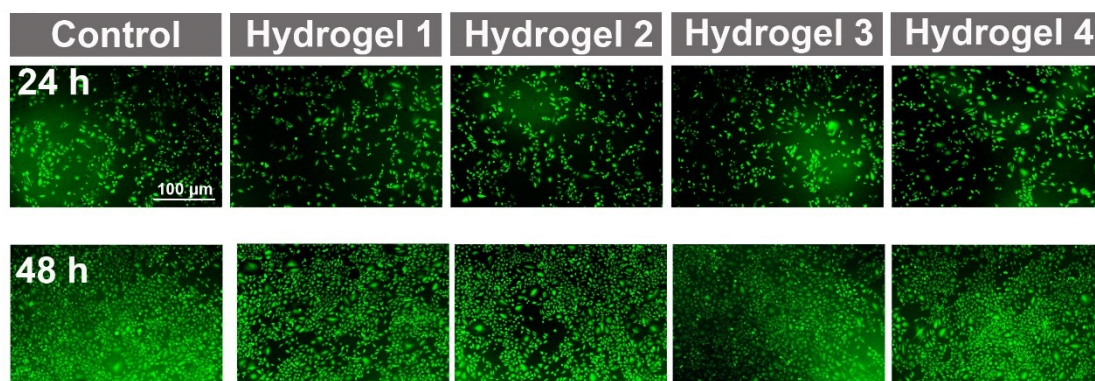

Figure S8. The FDA staining of HUVECs after treatment with different hydrogel at

24 and 48 h. Scale bars: 100  $\mu\text{m}$ .

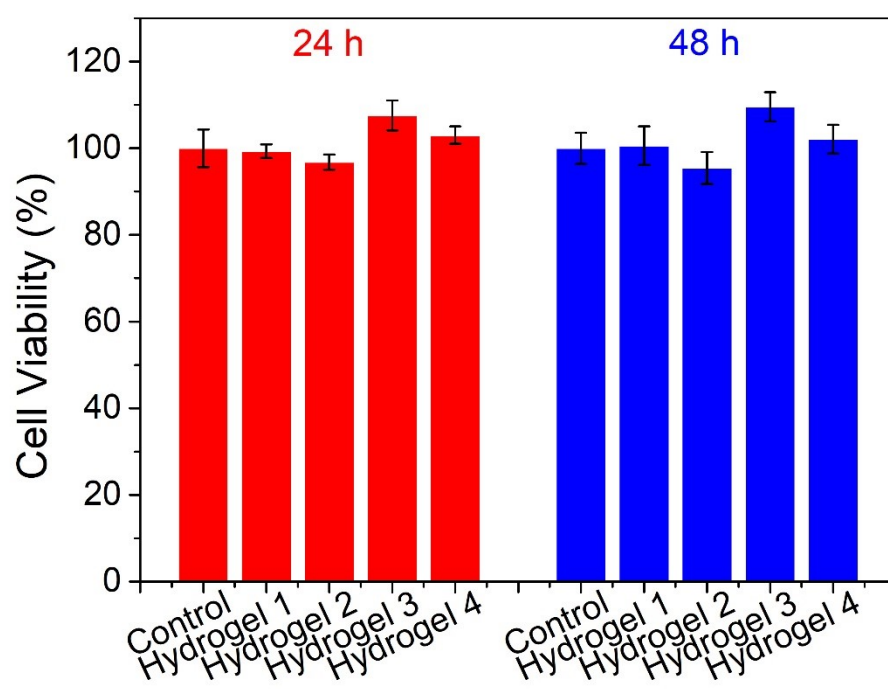

Figure S9. Cell viability of HUVECs after treatment with different hydrogel at 24 and

48 h.
